# Supplementary material
Source: publisher figshare collection journal article supplement (https://tandf.figshare.com/ndownloader/files/17281775)
Supplement: Supplementary file 1 [file 17281775]

***Supporting Information***

**A new carbazole-based colorimetric and fluorescence probe for the detection of sulfur dioxide**

Chen Jianga, Yuewei Yaoa, Jingjing Mengb*, Cheng Yaoa**

a College of Chemistry and Molecular Engineering, Nanjing Tech University, Nanjing 211816(China)

b College of Biotechnology and Pharmaceutical Engineering, Nanjing Tech University, Nanjing 211816 (China)

**Fig. S1** 1H NMR of probe **CBB**

**Fig. S2** 13C NMR of probe **CBB**

**Fig. S3** ESI-MS of probe **CBB**

**Fig. S4** The linear curve established by the fluorescence intensity (593 nm) versus the concentrations of HSO3-.

**Fig. S5** The time-dependent FL spectrum of probe **CBB** toward HSO3-.

**Fig. S6** The FL intensity of **CBB** (20 μM) in different pH (1.0-14.0) in the absence and presence of HSO3- (λex = 454 nm).

**
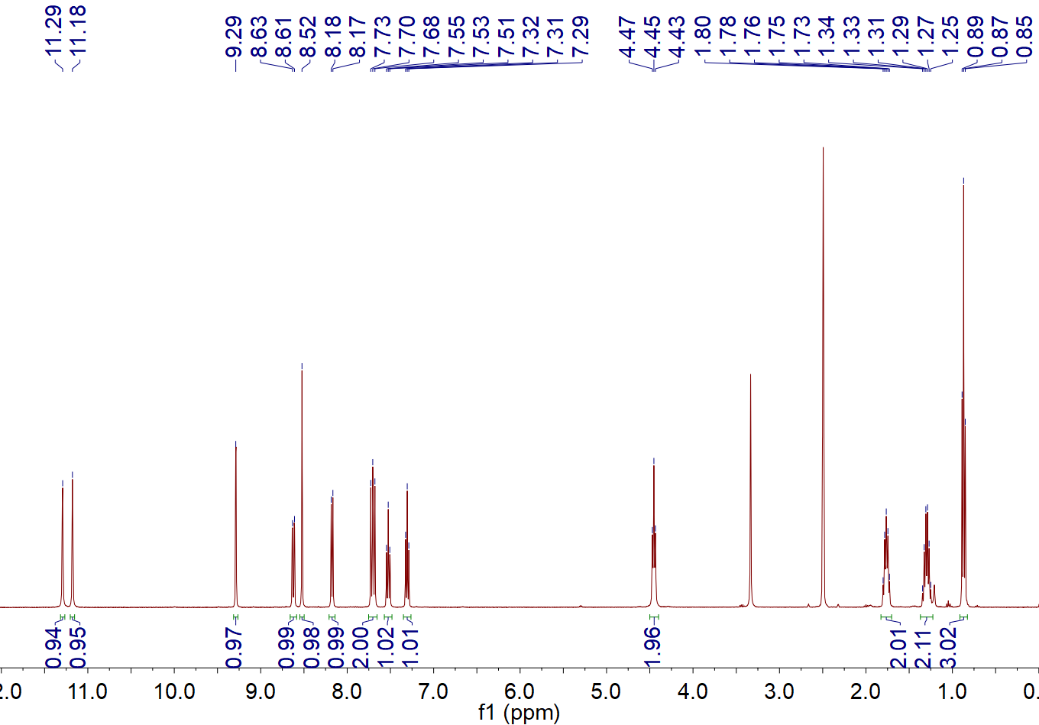
**

**Fig. S1** 1H NMR of probe **CBB**


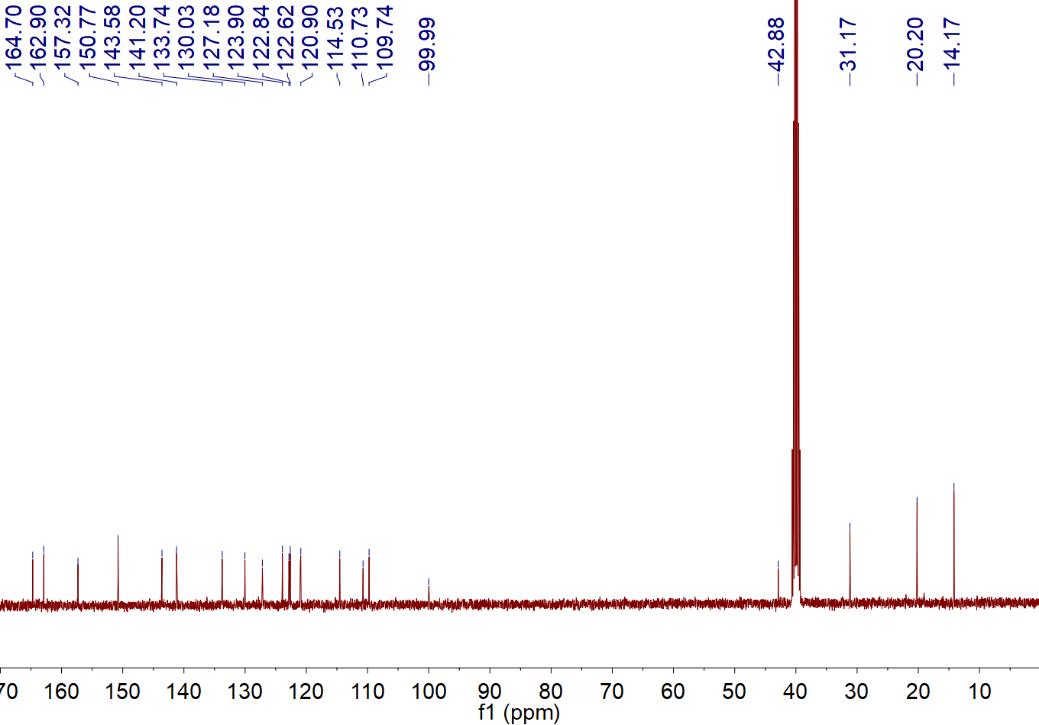


**Fig. S2** 13C NMR of probe **CBB**


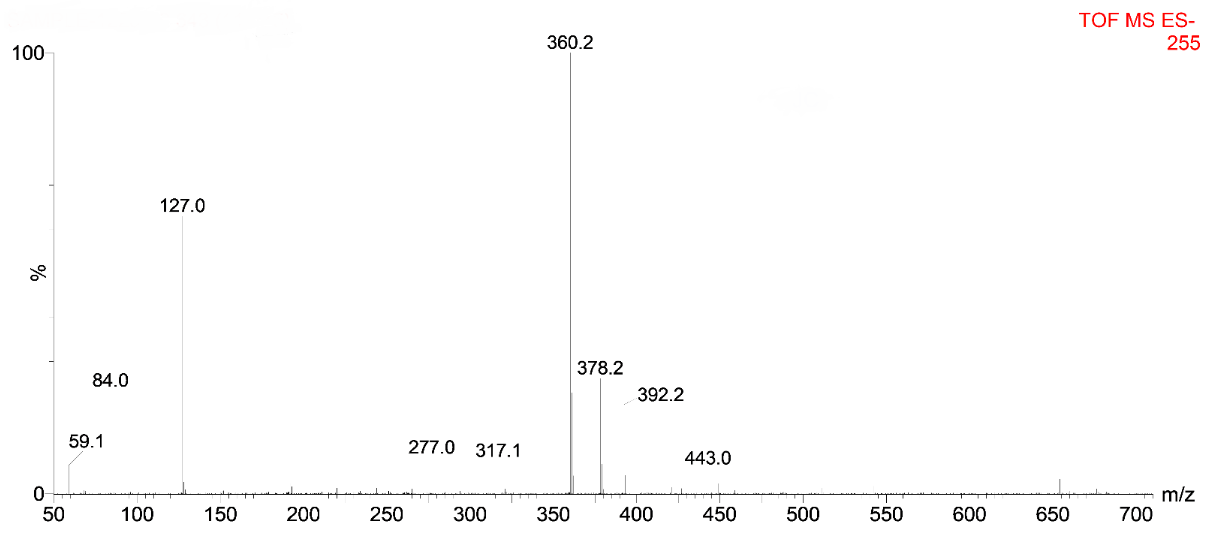


**Fig. S3** ESI-MS of probe **CBB**


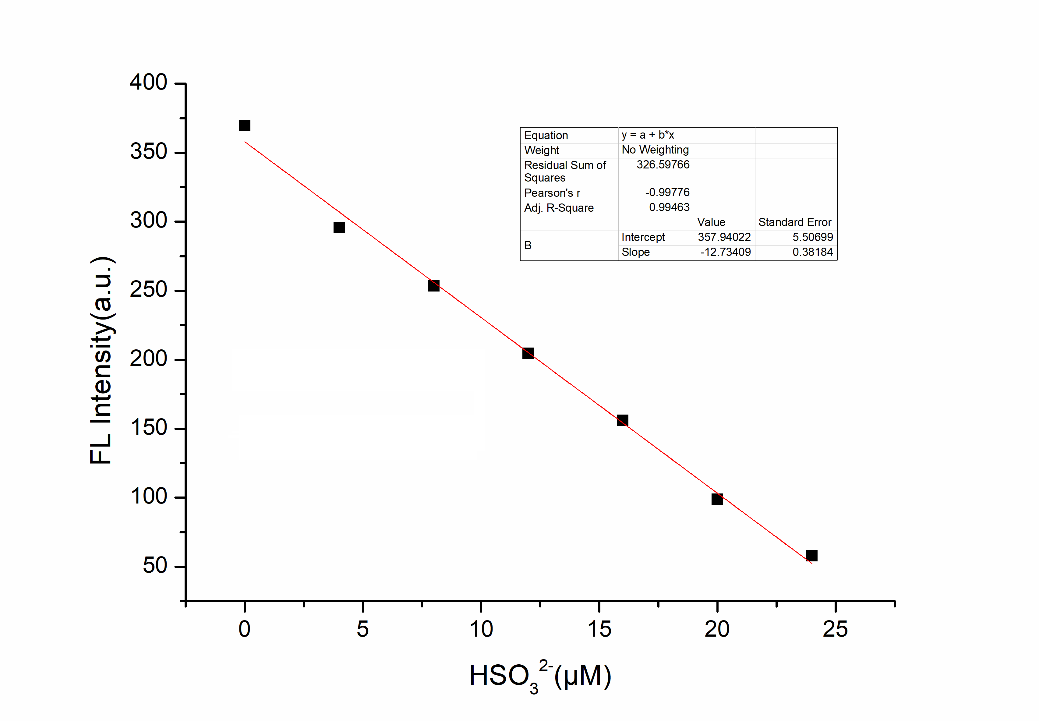


**Fig. S4** the linear curve established by fluorescence intensity (593 nm) versus the concentrations of HSO3-.





**Fig. S5** The time-dependent FL spectrum of probe **CBB** toward HSO3-.





**Fig. S6** The FL intensity of **CBB** (20 μM) in different pH (1.0-14.0) in the absence and presence of HSO3- (λex = 454 nm).
